1 **A potential transition from a concentrated to a generalized HIV**  
2 **epidemic: the case of Madagascar**

3 **Authors**

4 David Alonso<sup>§</sup>; Computational and Theoretical Ecology CEAB-CSIC, Blanes, Spain.

5 ORCID num: 0000-0002-8888-1644

6 Xavier Vallès; International Health Program, North Metropolitan Health Area from

7 Barcelona, Hospital Universitari Germans Trias i Pujol, Badalona, Spain; Institut

8 d'Investigació en Ciències de la Salut Germans Trias i Pujol, Badalona, Spain.

9 ORCID num: 0000-0002-4445-1490;

10

11 <sup>§</sup>Corresponding Author: David Alonso, C/Acces Cala Sant Francesc, 14, 17300-

12 Blanes, Catalonia, Spain; Tel: +34-647841899, email: dalonso@ceab.csic.es

13

14 **Word count:6236**

15

16 **Abstract**

17 HIV expansion is controlled by a range of interrelated factors, including the

18 natural history of HIV infection and socio-economical and structural factors.

19 However, how they dynamically interact in particular contexts to drive a transition

20 from concentrated HIV epidemics in vulnerable groups to generalized epidemics is

21 poorly understood. We developed a compartmental dynamic model using available

22 data from Madagascar, a country with a contrasting concentrated epidemic, to

23 explore the interaction between these factors with special consideration of

24 commercial and transactional sex as HIV-infection drivers. The model predicts

25 sigmoidal-like prevalence curves with turning points within years 2020-2022, and  
26 prevalence reaching stabilization by 2033 within 9 to 24% in the studied (10 out of  
27 11) cities, similar to high-prevalence regions in Southern Africa. Circumcision  
28 could have slowed down HIV propagation, but, given the key interplay between  
29 risky behaviors associated to young women and acute infections prevalence,  
30 mediated by transactional sex, the protective effect of circumcision is currently  
31 insufficient to contain the expansion of the disease in Madagascar. These results  
32 suggest that Madagascar may be experiencing a silent transition from a  
33 concentrated to a generalized HIV epidemic. This case-study model could help to  
34 understand how this HIV epidemic transition occurs.

35

36 **Key words:** HIV epidemiology, Key and vulnerable populations, Modeling,  
37 Structural drivers, Africa, Gender

38

## 39 **Introduction**

40

41 In 1981 the first cases of AIDS were described in San Francisco (USA), and  
42 the infectious nature of the new entity was soon established. By 1984 the causal  
43 pathogen, the HIV, was characterized, and the transmission mechanisms were  
44 described. By then, the world realized that the infection was already widespread in  
45 Sub-Saharan Africa, where the majority of cases still occur and, more specifically,  
46 in Southern-Africa with a pattern of generalized epidemics. However, reasons why  
47 some countries or regions in Sub-Saharan Africa show disparate epidemic profiles

48 remain unclear. Although the mechanisms that drive HIV expansion are well-  
49 established, how they interact to shape the transition from low to high prevalence  
50 and sustained HIV incidence has not been fully elucidated, but has important  
51 implications for guiding responses [1]. Concentrated HIV epidemic are defined by  
52 the occurrence of the infection largely in identified vulnerable groups, such as sex  
53 workers, men who have sex with men, and injected drugs users. Conversely, HIV  
54 epidemic is termed as generalized when the transmission is sustained in the general  
55 population, defined as a general population prevalence of over 1% or in a sentinel  
56 population like pregnant women. The transition from concentrated to generalized  
57 epidemic would take place if  $R_0$  is over 1 for a long period of time with self-  
58 sustained transmission within the general population. From a public health  
59 perspective, once the HIV epidemic has a generalized profile, it would likely persist  
60 despite effective programs focusing on vulnerable groups.

61 In this study, we develop a new mathematical model to explore the  
62 mechanisms driving such transition, using Madagascar as a case-study. The island  
63 of Madagascar (formally Republic of Madagascar) is located in the east coast of  
64 Africa, close to Mozambique and South-Africa. By contrast to Southern Africa,  
65 Madagascar shows a low prevalence of HIV in the general population (less than  
66 1%), alongside a high HIV prevalence among key populations. This is an  
67 astonishing concentrated epidemic profile, particularly given that Madagascar  
68 shows a widespread presence of the most recognized risk factors associated with  
69 HIV acquisition [2]. Since the late 90's, previous studies have predicted that  
70 Madagascar was near the tipping point towards a generalized epidemic [2, 3]. The

71 transition has not occurred to date, even if the general trend is an increase of  
72 prevalence among key populations [2].

73

74

75

## 76 **Methods**

77

### 78 *The HIV Transmission Model*

79 We represent the temporal dynamics of disease spread by a set of ordinary  
80 differential equations [4]. This system represents the progression of the disease as a  
81 consequence of sexual encounters between infectious and non-infected individuals  
82 (see Fig 1).

83

84 **Figure 1:** Graphic representation of women and men subpopulations progressing  
85 through the different stages of the disease since they acquire the infection from  
86 infectious males and women, respectively<sup>1</sup>

It is made available under a [CC-BY 4.0 International license](https://creativecommons.org/licenses/by/4.0/).

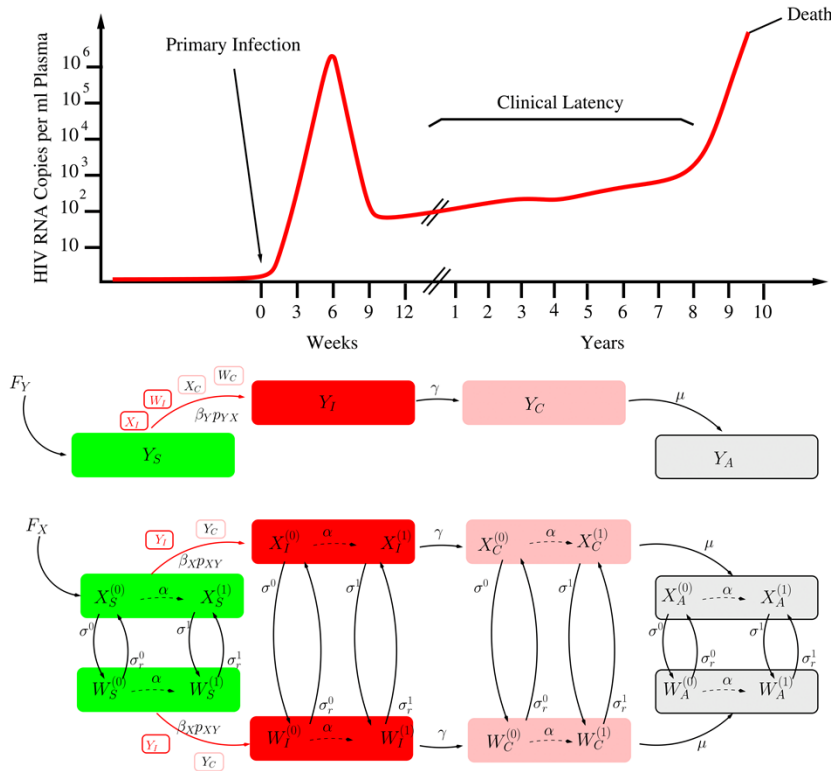

87

88

89 <sup>1</sup>At any stage of the disease, women (X) can become sexual workers (W), at rate  $\sigma$ , or reverse that  
 90 condition, at rate  $\sigma_r$ . The aging rate  $\alpha$  controls the transition from young (see superscript (0)) to  
 91 adult women (see superscript (1)). All stages, both in men and women, are subject to mortality.  
 92 Additional disease- induced mortality is only considered during the AIDS phase (see subscript A).  
 93 For simplicity, arrows representing this fatal transition are not shown. The typical course of a HIV  
 94 infection is drawn on the top panel.

95

96 The whole population is divided into a set of groups. The male population is  
 97 considered as a single group, while female population is subdivided into four  
 98 groups: two groups according to sexual activity (sexual workers and rest of women),  
 99 where each of them is in turn subdivided into young Adolescent Girls and Young  
 100 Women or AGYW (women between 15 to 24 years old) and adult females. The

101 particular consideration of AGYW is based on the recognition of their high  
102 vulnerability to HIV in Sub-Saharan Africa (see discussion) [5]. Both males and  
103 females are recruited into the population as fully susceptible individuals,  
104 represented by the subscript S in the set of dynamic variables [see Eqs (SA1)-(SA11)  
105 in SI.]. These recruitment rates are defined as the number of males and females  
106 per unit time that reach sexual maturity at any given time. As these individuals  
107 encounter infectious sexual partners, they can acquire the infection and then  
108 transition to the HIV acute infection stage (see subscript (I) in Fig 1 and equations  
109 in SI). This stage lasts, on average, between 2 and 3 months [6, 7] (see values in  
110 Table SA1 in SI), and is characterized by a transient high viral load and  
111 infectiousness (Fig 1) [7, 8]. The following stage (chronic or stable stage) is  
112 characterized by a much lower viral loads and infectiousness. The duration (see  
113 subscript C) is controlled by the rate  $\mu$  (see Fig 1), and lasts around 10 years [7, 9]  
114 followed by the breakdown of the immune system leading into the AIDS stage (see  
115 subscript A). See the supporting information (SI) for a comprehensive description  
116 of the system of ODEs.

117

### 118 *The Demographic Model*

119

120 In the absence of disease transmission, female and male adult subpopulations grow  
121 as a result of a balance between a recruitment rate into sexual maturity and an  
122 average mortality rate. Adult populations are driven by time-dependent  
123 demographic parameters (recruitment rates,  $F_X$  and  $F_Y$  , and adult mortality rates,

124  $\delta X$  and  $\delta Y$  ).  $F_X$  and  $F_Y$  represent the absolute number of females and males  
125 entering sexual active life per year, respectively. They depend on the population  
126 size of every city and have a monotone increasing trend over time, which along with  
127 immigration from rural areas, leads to demographic growth (see the case of  
128 Antananarivo in Fig SC1). In the supporting information, we explain the strategy  
129 we followed to accurately estimate them from demographic life table data. The rest  
130 of model demographic parameters ( $\alpha$  and  $\sigma$ 's, see Fig 1 and Table SA1 in SI) were  
131 searched to be compatible with surveyed sex worker population across cities in  
132 2014 and 2017. We fit a trajectory for the number of sex workers that could have  
133 been observed from 2000 to 2016 under two reasonable hypotheses, namely, the  
134 constant-fraction and the sigmoidal hypotheses. The first one assumes that the  
135 average fraction of sex workers in the population remained constant over the whole  
136 period of interest (2000-2016). The second hypothesis takes into consideration  
137 Madagascar economic crises (2009-2013) and makes the assumption that the  
138 fraction of sexual workers within the adult female population could have increased  
139 as a consequence of the crisis. We modeled this growth as a sigmoidal curve (see SI  
140 for details).

141

### 142 *Model Validation*

143

144 We used disease data (see Table SF1 in SI) and the demographic information  
145 found in annual life tables from 2000 to 2016 to search for parameter  
146 combinations able to yield temporal trajectories in agreement with the HIV

147 epidemiological data available. The process of model assessment and validation  
148 was done in three different phases: (1) the simple demographic model [see Eqs.  
149 (SA13) from the SI], (2) the expanded demographic model [see Eqs. (SA12) from  
150 the SI] and, finally (3) the full disease transmission model [see Eqs. (SA1)-(SA11)  
151 from the SI]. Parameter estimations were based on several data sources [10-13].  
152 Initial population values were chosen to correspond to the year 2000. Adult sex  
153 ratio is considered 1:1 [12]. Disease initial HIV prevalence for sexual workers in  
154 2000 was set to be a 1% of the 2016 prevalence value for each city (see Table SF1  
155 and SF2 in SI) because these yield very low initial numbers of infected individuals  
156 in 2000 (between 1 and 10 for most cities). Disease prevalence for the rest of groups  
157 at the initial year are then set accordingly. Parameter distributions consistent with  
158 both demographic and disease data showed that model parameter values were  
159 further constrained by population and disease data over the studied period (see Fig.  
160 SE7 in SI).

161

### 162 *Model Projections*

163

164 The ensemble of parametric configurations providing good fit to data up to  
165 2016 (see Table B1 and B2 in SI) was then used to project the evolution of the  
166 disease up to 2033. The numerical integration of the full system requires annual  
167 time-dependent parameters, this is, future recruitment and mortality rates from  
168 2016 to 2033. These were extrapolated from the same demographic life tables  
169 under the assumption that mortality and fertility rates maintain the trends



170 observed between 2000 and 2016. This procedure yielded expected annual rates  
171 (FX , FY ,  $\delta X$  , and  $\delta Y$  ) up to 2033 (see Fig. SE1 in SI). Model projections were  
172 then calculated from year 2016 up to year 2033 taking into account the uncertainty  
173 we have in model parameter estimates (see SI for details).

174

### 175 *Data availability*

176

177 Base and intermediate data used for this study is fully available in the  
178 referenced link as a Dryad dataset [14].

179

180

## 181 **Results**

182

### 183 *Ro and the Stationary State*

184 The average Ro values across the 10 studied cities are shown in Fig 2 (see  
185 also Tables SB1 and SB2 in SI). Since some parameters are time-dependent, these  
186 values correspond to year 2000, and are calculated using Eq (SB46) (see SI). They  
187 appear to be consistently bounded between 3 and 9 across the different cities. We  
188 plot Ro in year 2000 in terms of male sexual encounter rates and the probability  
189 ( $pY X$ ) of acquiring the infection for a male encountering an infectious female for  
190 the city of Antananarivo (Fig 3). This allows picturing the effect on Ro of  
191 circumcision, which would reduce this infection probability. In no city, the  
192 conservative estimation of 60% risk reduction due to circumcision [15-17] of HIV

193 transmission from female to male ( $p_{YX}$ ) would have taken  $R_0$  below 1 (see also  
194 Figs. SB1 and SB2 in SI). We also explore the effect of circumcision in Fig 4, where  
195 we compare model predictions when we use a constrained prior ( $0 < p_{YX} <$   
196  $0.0004$ ) vs using a less constrained one ( $0 < p_{YX} < 0.001$ ) in our parameter  
197 searches (see also Fig SE4 and SE5 in SI). If  $R_0 > 1$  and parameters were kept  
198 constant, stationary prevalence values would be reached. This stationary state can  
199 be calculated as well by using a semi-analytical approach [18] (see Fig SA1 in SI).

200

201 **Figure 2:**  $R_0$  values in 2000 and HIV prevalence levels both in the general (GP)  
202 and in the SW population for the two last years for which surveyed data existed  
203 (2012 and 2016, see Table SF1 in SI) along with our model prediction for 2033 (see  
204 shaded row)<sup>1</sup>.

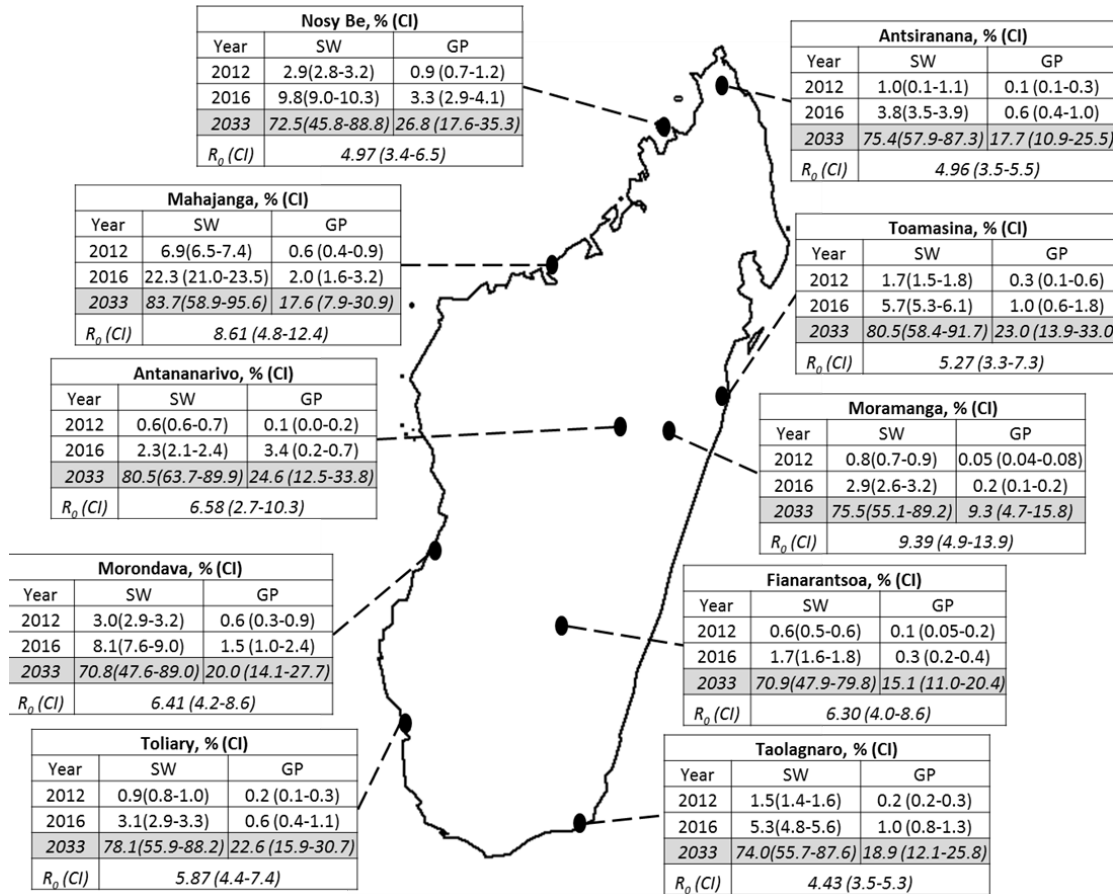

205

206 1. Figure modified from [2] with permission from the authors.

207

208 **Figure 3:**  $R_0$  changes as a function of  $\beta Y$ , the sexual encounter rate of males, and

209  $pY X$ , the transmission probability from infected females to males<sup>1</sup>.

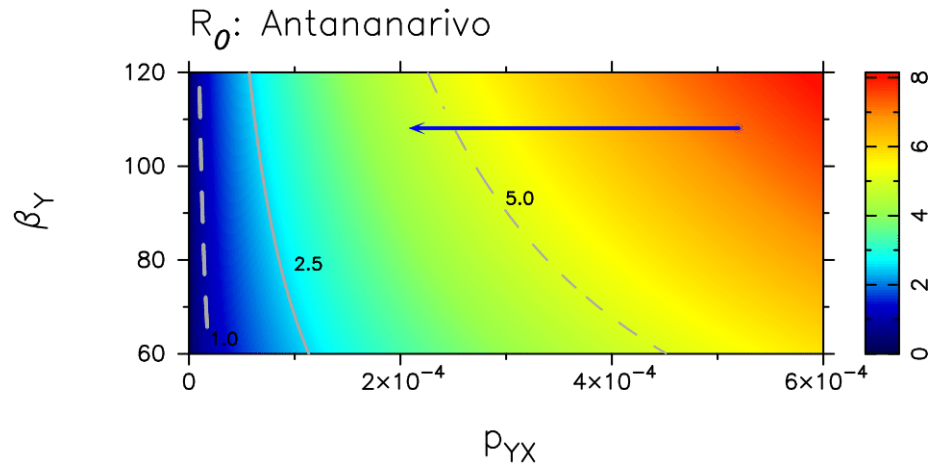

210

211

212 1. The rest of model parameters, but  $\beta_Y$  and  $p_{YX}$ , are kept constant. Their values are chosen  
213 to correspond to Antananarivo (see Table SB1, and also Figs. SB1 and SB2 in SI). Time-  
214 dependent parameters  $F_X$ ,  $F_Y$ ,  $\delta_X$  and  $\delta_Y$  are set to their values in 2000. The estimated  
215 average female- to-male transmission probabilities and the sexual encounter rates ( $\beta_Y$ ) are  
216 represented by a little circle defining the initial coordinates of the arrow. The tip of the  
217 arrow represents the potential reduction in  $R_0$  caused by a 60% reduction in the  
218 transmission probability from infectious females to males as a consequence of circumcision  
219 (as reported in [14-16]).

220

## 221 *Model Projections*

222

223 The model shows sigmoidal-like dynamics of disease establishment (see Fig  
224 5 and Figs. SE2-SE6 in SI) upon introduction, which can be characterized by three  
225 different phases. The introduction or initial phase may last about 15 to 25 years.  
226 This period is characterized by a slight exponential increase in prevalence, but still  
227 at very low levels. After this initial phase, the disease finally takes off. Full disease

228 establishment is only reached after about 35 to 55 years since the disease was  
229 initially introduced. A sharp transition between low to high prevalence  
230 characterizes the intermediate or transition phase, which is fast and may only last  
231 about 10 years (see Fig SA2 in SI). These overall temporal scales are a direct  
232 consequence of the estimated parametric configurations within biologically  
233 reasonable ranges (see average values in Tables SB1 and SB2 in SI). To characterize  
234 these phases, we defined two thresholds and a turning point (the time at which the  
235 rate of increase along the projected temporal evolution is the highest). The first  
236 threshold which is the end of the initial phase is set when prevalence is 10% of the  
237 maximum value. The second threshold which is the beginning of the third phase is  
238 set when prevalence has reached 90% of the corresponding maximum value.  
239 Maximum prevalence is defined as the prevalence level reached by the end of the  
240 projected period (2033). Turning-point year distributions and the prevalence levels  
241 in the whole population for the ensemble of parametric configurations are shown in  
242 Fig 4a and 4b.

243

244 **Figures 4a and 4 b:** Turning points (blue, left vertical axis) and expected  
245 prevalence in 2033 (magenta, right vertical axis) calculated for the projected  
246 temporal evolution of total disease prevalence within the general population in the  
247 10 cities<sup>1</sup>.

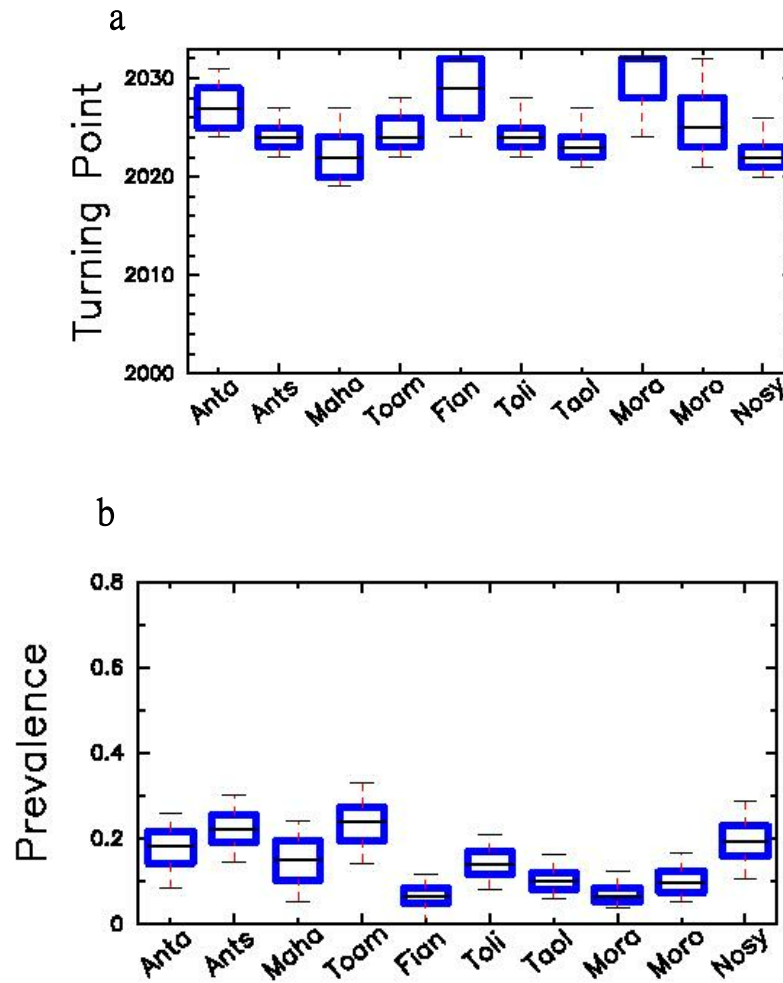

248

249

250

251

252

253

254

255

256

257

258

259

260

1. Box plots represent distributions across the parameter configurations that provided a good fit to data for the period 2000-2016. In Fig 4a, parametric configurations were searched within  $pY X$  values between 0.0 and 0.001, as indicated in Table SA1 in SI, while, in Fig 4b, searches were conducted by constraining even more  $pY X$  (between 0.0 and 0.0004), to mimic the effect of circumcision as a 60% reduction in transmission from females to males.

Disease prevalence for every key group follows a slightly different trajectory from introduction to full establishment, being always the sex workers prevalence

261 the first to take off, and the one reaching the highest values. For comparison, we  
262 show the temporal evolution of the prevalence within sex workers and the general  
263 population in Antananarivo (Fig 5).

264

265 **Figures 5a and 5b:** Projected prevalence trends in Antananarivo, as a  
266 fraction of infected individuals, for the SW (PSW) and overall adult (P) populations  
267 are represented<sup>1</sup>.

268 **a**

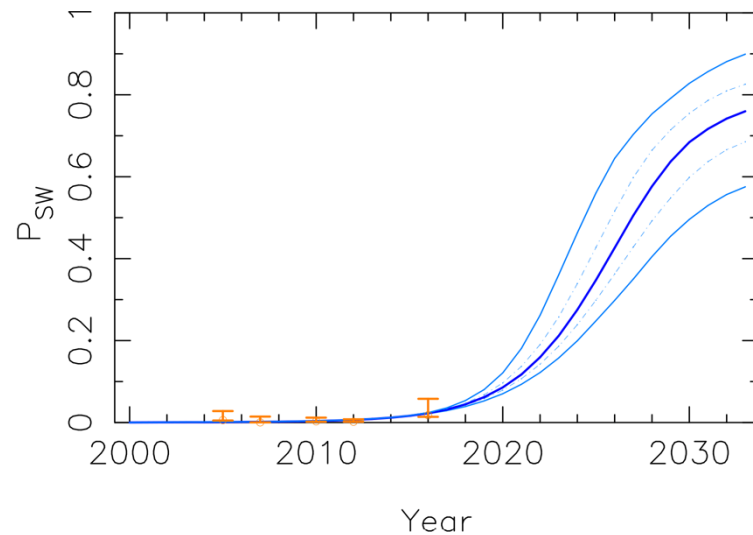

269

270 **b**

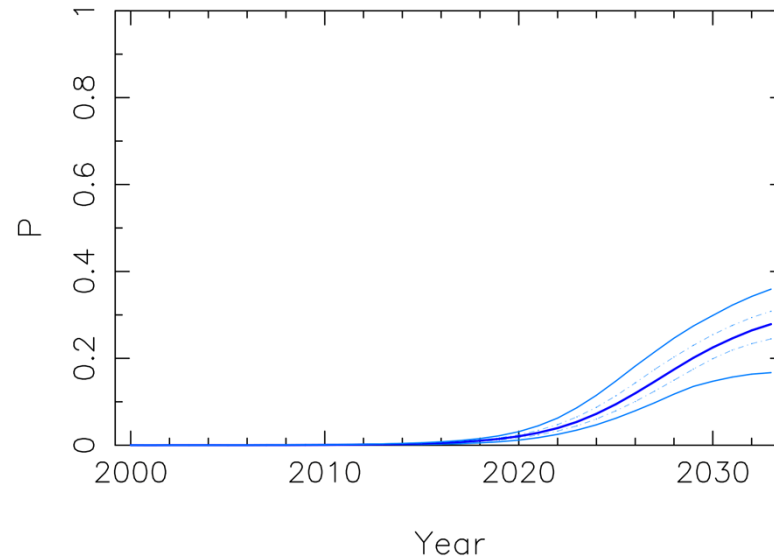

271

272 1. True observed data (for 2005, 2007, 2010, 2012 and 2016) are highlighted (in orange) in  
273 panel (a), with error bars representing confidence intervals. The five lines represent 5%,  
274 25%, 50%, 75%, and 95% percentiles from the lowest to the highest values, respectively.

275

276 Other cities showed a similar pattern (see Figs. SE2-SE6 in SI). Our model  
277 predicts a sharp increase in prevalence values around 2022 until reaching steady  
278 values over 2030 (see Figs 4 and 5). This pattern is consistent across cities (see also  
279 Figs SE2-SE6 in SI). In Fig 5a, we show, for instance, an increase of disease  
280 prevalence within the sex worker key population jumping from average values of  
281 1% before 2015 to values as high as 60% after 2030, while overall prevalence in the  
282 total population stabilize around values from 20% to 30% (Fig 5b). We recall here  
283 that overall prevalence is given as a fraction of total adult population. Also, we  
284 visually show a summary of projected prevalence in 2033 in the general population  
285 along with of  $R_0$  values in 2000 across cities over the map of Madagascar (see Fig  
286 2).



287

## 288 **Discussion**

289 Our model supports the notion that a complex interplay between different  
290 drivers determines the timing and speed of the transition from a concentrated to a  
291 generalized HIV epidemic across different countries and sub-regions. In  
292 Madagascar, we believe that two major factors may have been modulating disease  
293 expansion, and delaying this potential transition: the late/slow introduction of HIV  
294 and/or widespread practice of circumcision. According to our analyses, HIV  
295 prevalence should have been very low still in 2000 according to the earliest data  
296 available from 2005 [19] and 2007 [20], but estimated  $R_0$  was already much larger  
297 than 1 in most cities. Therefore, the model reveals that the protective effect of  
298 circumcision was minimal back then, and may have already vanished in  
299 Madagascar (Fig 3). This is in agreement with previous authors, which pointed out  
300 that over certain threshold of HIV prevalence among sex workers, circumcision  
301 does not have a substantial effect towards HIV prevention at population level [21].  
302 Furthermore, our results suggest that the turning point towards generalized  
303 epidemic in Madagascar is very close or may have even been surpassed in certain  
304 localities (Fig4). At this stage, AGYW may play a key role mediated by transactional  
305 sex in the generalization and maintenance of the epidemics in the general  
306 population (Fig 6), with a key interaction with acute HIV infections.

307

308 **Figure 6:** Conceptual model of HIV progression from concentrated epidemic to  
309 generalized and self-maintained epidemic in countries with the socio- behavioural

310 characteristics of Madagascar<sup>1</sup>.

311

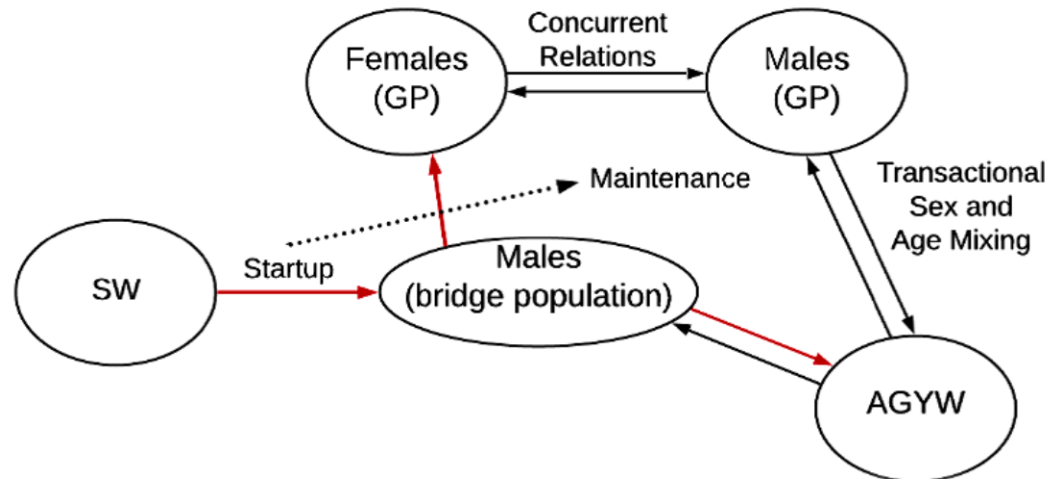

312

313 1. The start up of the epidemic is characterized by a long-lasting and steady increase of HIV  
314 prevalence among SWs. HIV infection spills over to GP (adult females, AGYW and indirectly other  
315 GP males) through bridge population (SW clients, see red arrows). The intensity of this initial  
316 spillover is enhanced as prevalence among SW increases in a positive feedback manner. Once a  
317 certain threshold in GP has been reached, prevalence/incidence in GP may be self-sustained and  
318 tend to increase through high risk intercourse between AGYW and older adults. This threshold may  
319 be reached sooner depending on the prevalence of age disparate relationships, concurrency and  
320 inconsistent use of condoms. Transactional sex may be the main mediator of such risk factors.

321

322

323 However, the generalization of the HIV epidemic is far from a homogeneous  
324 process across the 11 studied cities, and it looks more like a patchwork of micro-  
325 epidemics leading to different regional and subregional stages (Fig 2). In spite of  
326 this heterogeneity, if our projections are correct, future HIV prevalence in

327 Madagascar for next decade (2030s) may be similar to other HIV/AIDS highly hit  
328 countries from the Southern African region between 9-24%, unless a sustained  
329 action is taken.

330 Our model is based on the key recognition of commercial sex as the main  
331 driver of HIV infection leading to a generalized epidemic in Sub-Saharan Africa  
332 [21]. However, we expanded the classical concept of sex workers, encompassing the  
333 consideration of transactional sex (occasional sexual intercourse in exchange of any  
334 material or non-material benefit other than money). Transactional sex has been  
335 underscored as a risky factor for HIV expansion [22], and it is especially prevalent  
336 among AGYW and well documented in Madagascar [2, 23]. A disproportionate  
337 fraction of sexual encounters between males and younger females (intercourse  
338 mixing age heterogeneity, factored by the parameter  $f_W$  and  $f_0$ , see Table SB1 and  
339 SB2, and also Fig SE7 in SI), has been early noticed as a risk factor of HIV  
340 acquisition for AGYW on itself, and through associated risky behaviors, such as  
341 concurrency and inconsistent use of condoms [24-26]. Thereby, AGYW is now  
342 considered as a truly key population in most Sub-Saharan countries [5], with six or  
343 sevenfold higher risk of HIV acquisition compared to males of the same age [26,  
344 27]. In Madagascar, all of these factors and behaviors have been reported as highly  
345 prevalent [2]. Of note, the widespread presence of sex working and transactional  
346 sex is strongly influenced by underlying socio-economic factors and, since they are  
347 both driven by financial insecurity and poverty [26] and structural factors such  
348 violence and criminalization [28]. Consequently, our model may underestimate the  
349 speed of transition towards generalized epidemics if a major economic crisis occurs,

350 as we expect as consequence of the current Covid-19 epidemic or climate change  
351 impacts in form of droughts and secondary food insecurity, as it has been recently  
352 experienced in Madagascar [29], which may in turn hamper the HIV response [30].  
353 Indeed, it has been underlined the disproportionate susceptibility of women to  
354 these factors [31]. For this reason, it is striking to observe that future projections of  
355 HIV/AIDS epidemics focus almost entirely on sustained provision of anti-retroviral  
356 drugs and HIV-services [32, 33] without considering the impact of the Covid-19  
357 crisis on the economy and other cofactors.

358 In agreement with previous work [34, 35], our model invariably predicts  
359 that the sex workers population is the first to take off in the trajectory towards  
360 disease establishment (Fig 5a). At that point, sex workers HIV prevalence may be  
361 the startup of the HIV introduction into the general population through bridge  
362 populations (clients), followed by a further expansion of HIV infection mediated by  
363 transactional sex mainly practiced by AGYW and older males. Therefore, the  
364 intercourse mixing-age model and risky behaviors associated to transactional sex  
365 may play a crucial role in the spread and maintenance of the epidemics once HIV  
366 prevalence has reached a certain threshold among general population (see Fig 6).  
367 At a certain stage, the HIV epidemics evolve independently from the number of  
368 HIV positive sex workers [34]. The inclusion of different infectiousness levels (see  
369 Fig 1) through the stages of the natural history of a HIV infection allows to explore  
370 their interaction with behavioral factors which are particularly associated to the  
371 described pattern of sexual encounters [36], and circumcision. Here, we strongly  
372 suggest that acute infections would play an important role in the epidemics

373 transition. Accordingly, previous authors pointed out the disproportionate  
374 contribution of acute infections at the early stages of disease expansion [37].  
375 Although most previous HIV compartmental models of this kind [38, 39] do not  
376 consider these critical interactions, previous work considering some of them leads  
377 to similar conclusions [35].

378 Main parameters of HIV transmission established by previous observational  
379 studies lie within the bounds of our model estimations. Scarce HIV cases has been  
380 reported in Madagascar at least since 1989 [40]. Therefore, we calculated  $R_0$   
381 values in 2000, when prevalence was still thought to be very low. These values  
382 depend on most model parameters, and vary between about 3 and 9 across the  
383 different cities (Fig 2) in good agreement with observational estimations [41].  
384 However, these estimations may be a little inflated because they are calculated  
385 under the assumption of random sexual contacts between the different groups [42].  
386 Notwithstanding, these values are particularly useful for relative comparisons, and  
387 to elucidate which model parameters have the highest influence on disease  
388 propagation just after HIV introduction. They represent highest bounds, as it is  
389 known that in general contact heterogeneity, and non-random sexual mixing (for  
390 instance, sequential monogamy), commonly slows down disease propagation [43].  
391 In summary, from our case-study, we suggest that factors influencing the transition  
392 towards a generalized HIV epidemics result from a complex interplay between  
393 geographic isolation, which may be enhanced by political issues, slowing down the  
394 introduction of HIV, cultural practices, such as circumcision, but as well the  
395 societal consideration of women and gender-based practices that may protect

396 young women from risky behaviors (i.e. early marriage, matriarchal structures),  
397 biological (i.e. the key role of acute infections during the transitional phase), and  
398 socio-economic disruptions. The transition from rural to urban societies, with the  
399 interaction between all these elements, may exacerbate these underlying factors  
400 (erosion of traditional practices, increasing population mobility and lack of social  
401 protection towards AGYW).

402 Our study is limited first by the scarce information available on the  
403 distribution of women in the different key groups (Sex-workers and transactional  
404 sex, and non-sex-workers or -transactional sex). Specific hypotheses controlling  
405 this distribution are implicitly assumed in the set of  $\alpha$  and  $\sigma$ 's parameters (see Fig 1  
406 and Tables SA1, SB1 and SB2 in SI). Second, there is no direct data on the age-  
407 disparity of sexual relationships in Madagascar, and finally, the paucity of  
408 epidemiological time-series data, as pointed out previously [2]. These information  
409 gaps need to be filled to obtain more robust projections. Furthermore, we do not  
410 considered other key populations (men who have sex with men and injected drug  
411 users), which have been largely neglected [44], but their role in the generalization  
412 of epidemics should not be discarded. In fact, the role of injected drug users has  
413 been particularly underscored in Sub-Saharan Africa [45], and this represents an  
414 increasing population in Madagascar [2]. The bridge between these key population  
415 and the general population through bisexual intercourses and sex working, should  
416 be further explored. Finally, future models of this kind should also take into  
417 account mobility between localities as pointed out recently [46, 47]. At this stage,  
418 our model does not consider the movement of populations at risk (specifically sex

419 workers) between cities following tourist seasons, as it has been reported in  
420 Mahajanga and Nosy-be (the two cities with higher HIV prevalence among sex  
421 workers) [2, 23]. These dynamics may foster even more diffusion of HIV to other  
422 parts of the country. Our projections should be considered a call for action given  
423 the scant attention that HIV in Madagascar has received, and the Public Health  
424 crisis that potentially could unfold, but could still be avoided. Furthermore, the lack  
425 of mobility between cities and a possible underestimation of the amount of AGYW  
426 practicing transactional sex could make our model projections still conservative.  
427 Even admitting that our model is based on simplified assumptions and limited  
428 data, the case-study of Madagascar can help to understand how has occurred (or  
429 may occur) the transition from concentrated to generalized epidemics in different  
430 settings. In this sense, considering our projections, it is worrisome to see that  
431 Madagascar shows some of the poorest HIV response indicators in the world (only  
432 14% of persons living with HIV are estimated to be under follow-up and this data  
433 was not considered in our modeling estimates) [48]. Given the plausibility of the  
434 worst case scenario outlined in this article, it is important to set up observational  
435 studies on HIV prevalence/incidence and risky factors that would help to draft  
436 more accurate predictions, alongside the implementation of robust preventive  
437 measures focused on monitoring and identifying hot-spots and vulnerable key  
438 populations (sex workers and AGYW).

439

440

441 **Conclusion**

442

443           The UNAIDS Fast Track Strategy aimed to end HIV epidemic by 2030.  
444   However, in spite of the outstanding progress experienced, like the sustained  
445   decline on AIDS-related deaths, the disease is far from being under control.  
446   Setbacks could still happen, including crisis with major socio-economical or  
447   management care disruptions due to the Covid-19 epidemic, climate change or  
448   other natural disasters. Disentangling the interplay between the different factors  
449   driving HIV expansion requires a dynamic approach. By developing a new data-  
450   based transmission dynamic model, here we report that Madagascar could be  
451   undergoing a silent, non-linear transition from a low-prevalence, concentrated to a  
452   well-established generalized epidemic. Unless a sustained response is  
453   implemented, we foresee that this country would reach HIV prevalence similar to  
454   high endemic countries by 2033. Not only in Madagascar, but also in other settings,  
455   our work can help to understand the context-dependent interactions underlying  
456   these rapid transitions and raise alarm bells before it is too late to avoid them.

457

458

459

## 460 **Supporting Information Appendix (SI)**

461

462   A PDF file includes detailed supporting information about the dynamical ODE  
463   system corresponding to the model (Fig 1), the  $R_0$  calculation, the strategy to  
464   conduct parameter estimation, model projections, and data sources. Baseline and



465 intermediate data has been made fully accessible [14] and we included as  
466 supplementary material a txt file with instructions to disclose and analyze it  
467 independently.

468

### 469 **Author contributions**

470

471 Both authors contributed equally to conceptualization, investigation,  
472 methodology, project administration, funding acquisition and resources,  
473 visualization, data, writing original draft, and reviewing and editing the final  
474 manuscript. XV contributed to data acquisition, and underlying data verification.  
475 DA contributed to software, formal analysis, model fitting and validation, and the  
476 preparation of the supporting information file. All authors have read and agreed to  
477 the submitted version of the manuscript.

478

### 479 **Author declaration**

480 The authors declare no conflict of interest.

481

### 482 **Ethical statement**

483

484 The study used aggregated data from previously published workds (see  
485 reference list) and did not included any sampling procedure with individual level  
486 information or the use of biological or personal data which would need the consent  
487 from individual participants. This study is part of a larger HIV initiative in

488 Madagascar which had the clearance of the Ethics committee of the Ministry of  
489 Public health of Madagascar (number 088/MSANP/CERBM).

490

## 491 **Acknowledgements**

492 This work was funded by the Spanish Ministerio de Ciencia, Innovacion y  
493 Universidades and the European Regional Development Fund (ERDF), under the  
494 project CRISIS (PGC2018-096577-B-I00 to D.A.). The field work, data acquisition  
495 and data revision of XV was supported by the non-governmental organization  
496 (NGO) Medecins du Monde (France) and was funded by Expertise France (EF)  
497 (Initiative 5%, ref. num. 16SANIN208). We also acknowledge the Theoretical and  
498 Computational Ecology group at the Center for Advanced Studies of Blanes (CEAB-  
499 CSIC) for providing a nice and supportive working environment. We are also very  
500 thankful to Armun Liaghat at the University of Chicago, where the initial ideas of  
501 this work were developed during a Tinker Visiting Professorship stay (to DA),  
502 Molebogeng Rangaka, from the University College of London and Laurence Baril  
503 for their observations, corrections, careful proofreading and useful comments.

504

## 505 **References**

506

- 507 1. Brown T, Peerapatanapokin W. Evolving HIV epidemics: the urgent need to  
508 refocus on populations with risk. *Curr Opin HIV AIDS*. 2019 Sep;14(5):337-  
509 353. doi: 10.1097/COH.0000000000000571.

- 510 2. Raberahona M, Monge F, Andrianiana RH, Randria MJD,  
511 Ratefiharimanana A, Rakatoarivelo RA, Randrianary L, Randriamilahatra E,  
512 Rakotobe L, Mattern C, Andriananja V, Rajaonarison H, Randrianarisoa M,  
513 Rakotomanana E, Pourette D, Andriamahenina HZ, Dezé C, Boukli N, Baril  
514 L, Vallès X. Is Madagascar at the edge of a generalised HIV epidemic?  
515 Situational analysis. *Sex Transm Infect.* 2021 Feb;97(1):27-32. doi:  
516 10.1136/sextrans-2019-054254.
- 517 3. Behets F, Andriamiadana J, Rasamilalao D, Ratsimbazafy N, Randrianasolo  
518 D, Dallabetta G, Cohen M. Sexually transmitted infections and associated  
519 socio-demographic and behavioural factors in women seeking primary care  
520 suggest Madagascar's vulnerability to rapid HIV spread. *Trop Med Int*  
521 *Health.* 2001 Mar;6(3):202-11. doi: 10.1046/j.1365-3156.2001.00690.x.  
522 PMID: 11299037.
- 523 4. Anderson RM and May RM. *Infectious Diseases of Humans. Dy- namics and*  
524 *Control.* Oxford University Press, Oxford, 1991.
- 525 5. Dellar RC, Dlamini S, Karim QA. Adolescent girls and young women: key  
526 populations for HIV epidemic control. *J Int AIDS Soc.* 2015 Feb 26;18(2  
527 Suppl 1):19408. doi: 10.7448/IAS.18.2.19408.
- 528 6. Fiebig EW, Wright DJ, Rawal BD, Garrett PE, Schumacher RT, Peddada L,  
529 Heldebrant C, Smith R, Conrad A, Kleinman SH, Busch MP. Dynamics of  
530 HIV viremia and antibody seroconversion in plasma donors: implications for  
531 diagnosis and staging of primary HIV infection. *AIDS.* 2003 Sep

- 532 5;17(13):1871-9. doi: 10.1097/00002030-200309050-00005.
- 533 7. Hollingsworth TD, Anderson RM, Fraser C. HIV-1 transmission, by stage of  
534 infection. *J Infect Dis*. 2008 Sep 1;198(5):687-93. doi: 10.1086/590501.
- 535 8. Pinkerton SD. Probability of HIV transmission during acute infection in  
536 Rakai, Uganda. *AIDS Behav*. 2008 Sep;12(5):677-84. doi: 10.1007/s10461-  
537 007-9329-1.
- 538 9. Bacchetti P, Moss AR. Incubation period of AIDS in San Francisco. *Nature*.  
539 1989 Mar 16;338(6212):251-3. doi: 10.1038/338251a0.
- 540 10. CIA. Central Intelligence Agency.  
541 [https://www.cia.gov/library/publications/the-world-](https://www.cia.gov/library/publications/the-world-factbook/fields/2018.html)  
542 [factbook/fields/2018.html](https://www.cia.gov/library/publications/the-world-factbook/fields/2018.html), 2018. Accessed: September 2021
- 543 11. Instat. Institute de Statistique de Madagascar. <https://www.instat.mg>, 2018.  
544 Accessed: September 2021.
- 545 12. WHO. World Health Organization.  
546 <http://apps.who.int/gho/data/node.home>, 2018. Accessed: September  
547 2021.
- 548 13. Worldometers. Worldometers. [https://www.worldometers.info/world-](https://www.worldometers.info/world-population/madagascar-population/)  
549 [population/madagascar-population/](https://www.worldometers.info/world-population/madagascar-population/), 2018. Accessed: September 2021.
- 550 14. Alonso D, Valles X (2022). Supporting data for "A potential transition from  
551 a concentrated to a generalised HIV epidemic: the case of  
552 Madagascar". Dryad, Dataset. <https://doi.org/10.5061/dryad.3ffbg79mn>

- 553 15. Alsallaq RA, Cash B, Weiss HA, Longini IM Jr, Omer SB, Wawer MJ, Gray  
554 RH, Abu-Raddad LJ. Quantitative assessment of the role of male  
555 circumcision in HIV epidemiology at the population level. *Epidemics*. 2009  
556 Sep;1(3):139-52. doi: 10.1016/j.epidem.2009.08.001.
- 557 16. Sharma SC, Raison N, Khan S, Shabbir M, Dasgupta P, Ahmed K. Male  
558 circumcision for the prevention of human immunodeficiency virus (HIV)  
559 acquisition: a meta-analysis. *BJU Int*. 2018 Apr;121(4):515-526. doi:  
560 10.1111/bju.14102.
- 561 17. Lei JH, Liu LR, Wei Q, Yan SB, Yang L, Song TR, Yuan HC, Lv X, Han P.  
562 Circumcision Status and Risk of HIV Acquisition during Heterosexual  
563 Intercourse for Both Males and Females: A Meta-Analysis. *PLoS One*. 2015  
564 May 5;10(5):e0125436. doi: 10.1371/journal.pone.0125436.
- 565 18. Alonso D, Dobson A, Pascual M. Critical transitions in malaria  
566 transmission models are consistently generated by superinfection. *Philos  
567 Trans R Soc Lond B Biol Sci*. 2019 Jun 24;374(1775):20180275. doi:  
568 10.1098/rstb.2018.0275.
- 569 19. Comité National de Lutte contre le VIH/Sida. Resultats  
570 de l'Enquête de surveillance Biologique du VIH/SIDA et de la Syphilis.  
571 Ministère de la Santé du Planning Familial et de la Protection Sociale,  
572 Madagascar. 2005. Available at  
573 <https://www.scribd.com/document/48559097>
- 574 20. Comité National de Lutte contre le VIH/Sida. Resultats

- 575 de l'Enquête de surveillance Biologique du VIH/SIDA et de la Syphilis.  
576 Ministère de la Santé du Planning Familial et de la Protection Sociale,  
577 Madagascar. 2007. Available at  
578 <https://www.scribd.com/document/48559097>
- 579 21. Talbott JR. Size matters: the number of prostitutes and the global HIV/AIDS  
580 pandemic. PLoS One. 2007 Jun 20;2(6):e543. doi:  
581 10.1371/journal.pone.0000543.
- 582 22. Wamoyi J, Stobeanu K, Bobrova N, Abramsky T, Watts C. Transactional sex  
583 and risk for HIV infection in sub-Saharan Africa: a systematic review and  
584 meta-analysis. J Int AIDS Soc. 2016 Nov 2;19(1):20992. doi:  
585 10.7448/IAS.19.1.20992.
- 586 23. Freedman JJ, Rakotoarindrasata M. Remise en cause des frontières  
587 supposées entre travail du sexe et sexe transactionnel à Madagascar - le cas  
588 de Nosy-be. Technical report, Institut du Genre en Géopolitique, Paris,  
589 2020. Available at <https://igg-geo.org/?p=2434>.
- 590 24. Evans M, Maughan-Brown B, Zungu N, George G. HIV Prevalence and ART  
591 Use Among Men in Partnerships with 15-29 Year Old Women in South  
592 Africa: HIV Risk Implications for Young Women in Age-Disparate  
593 Partnerships. AIDS Behav. 2017 Aug;21(8):2533-2542. doi: 10.1007/s10461-  
594 017-1741-6.
- 595 25. Maughan-Brown B, Evans M, George G. Sexual Behaviour of Men and  
596 Women within Age-Disparate Partnerships in South Africa: Implications for

- 597 Young Women's HIV Risk. PLoS One. 2016 Aug 15;11(8):e0159162. doi:  
598 10.1371/journal.pone.0159162.
- 599 26. Leclerc-Madlala S. Age-disparate and intergenerational sex in southern  
600 Africa: the dynamics of hypervulnerability. AIDS. 2008 Dec;22 Suppl 4:S17-  
601 25. doi: 10.1097/01.aids.0000341774.86500.53.
- 602 27. Birdthistle I, Tanton C, Tomita A, de Graaf K, Schaffnit SB, Tanser F,  
603 Slaymaker E. Recent levels and trends in HIV incidence rates among  
604 adolescent girls and young women in ten high-prevalence African countries:  
605 a systematic review and meta-analysis. Lancet Glob Health. 2019  
606 Nov;7(11):e1521-e1540. doi: 10.1016/S2214-109X(19)30410-3.
- 607 28. Shannon K, Strathdee SA, Goldenberg SM, Duff P, Mwangi P, Rusakova M,  
608 Reza-Paul S, Lau J, Deering K, Pickles MR, Boily MC. Global epidemiology  
609 of HIV among female sex workers: influence of structural determinants.  
610 Lancet. 2015 Jan 3;385(9962):55-71. doi: 10.1016/S0140-6736(14)60931-4.
- 611 29. Makoni M. Southern Madagascar faces "shocking" lack of food. Lancet. 2021  
612 Jun 12;397(10291):2239. doi: 10.1016/S0140-6736(21)01296-4.
- 613 30. Orievulu KS, Ayeb-Karlsson S, Ngema S, Baisley K, Tanser F, Ngwenya N,  
614 Seeley J, Hanekom W, Herbst K, Kniveton D, Iwuji CC. Exploring linkages  
615 between drought and HIV treatment adherence in Africa: a systematic  
616 review. Lancet Planet Health. 2022 Apr;6(4):e359-e370. doi:  
617 10.1016/S2542-5196(22)00016-X.
- 618 31. Austin KF, Noble MD, Berndt VK. Drying Climates and Gendered Suffering:

- 619 Links Between Drought, Food Insecurity, and Women's HIV in Less-  
620 Developed Countries. Soc Indic Res. 2021;154(1):313-334. doi:  
621 10.1007/s11205-020-02562-x.
- 622 32. Jewell BL, Mudimu E, Stover J, Ten Brink D, Phillips AN, Smith JA, Martin-  
623 Hughes R, Teng Y, Glaubius R, Mahiane SG, Bansi-Matharu L, Taramusi I,  
624 Chagoma N, Morrison M, Doherty M, Marsh K, Bershteyn A, Hallett TB,  
625 Kelly SL; HIV Modelling Consortium. Potential effects of disruption to HIV  
626 programmes in sub-Saharan Africa caused by COVID-19: results from  
627 multiple mathematical models. Lancet HIV. 2020 Sep;7(9):e629-e640. doi:  
628 10.1016/S2352-3018(20)30211-3.
- 629 33. The Lancet. Maintaining the HIV response in a world shaped by COVID-19.  
630 Lancet. 2020 Nov 28;396(10264):1703. doi: 10.1016/S0140-6736(20)32526-  
631 5.
- 632 34. Bershteyn A, Klein DJ, Eckhoff PA. Age-dependent partnering and the HIV  
633 transmission chain: a microsimulation analysis. J R Soc Interface. 2013 Aug  
634 28;10(88):20130613. doi: 10.1098/rsif.2013.0613. PMID: 23985734;  
635 PMCID: PMC3785829.
- 636 35. Vickerman P, Foss AM, Pickles M, Deering K, Verma S, Eric Demers,  
637 Lowndes CM, Moses S, Alary M, Boily MC. To what extent is the HIV  
638 epidemic in southern India driven by commercial sex? A modelling analysis.  
639 AIDS. 2010 Oct 23;24(16):2563-72. doi: 10.1097/QAD.ob013e32833e8663.
- 640 36. Mah TL, Shelton JD. Concurrency revisited: increasing and compelling



- 641 epidemiological evidence. *J Int AIDS Soc.* 2011 Jun 20;14:33. doi:  
642 10.1186/1758-2652-14-33. PMID: 21689437; PMCID: PMC3133533.
- 643 37. Eaton JW, Hallett TB, Garnett GP. Concurrent sexual partnerships and  
644 primary HIV infection: a critical interaction. *AIDS Behav.* 2011  
645 May;15(4):687-92. doi: 10.1007/s10461-010-9787-8.
- 646 38. Silva CJ, Torres DFM. A SICA compartmental model in epidemiology with  
647 application to HIV/AIDS in Cape Verde. *Ecological Complexity.* 2017; 30:70-  
648 75. doi: 10.1016/j.ecocom.2016.12.001.
- 649 39. Omondi EO, Mbogo RW, Luboobi LS. A mathematical modelling study of  
650 HIV infection in two heterosexual age groups in Kenya. *Infect Dis Model.*  
651 2019 Apr 21;4:83-98. doi: 10.1016/j.idm.2019.04.003.
- 652 40. Andriamahenina R, Ravelojaona B, Rarivoharilala E, Ravaoarimalala C,  
653 Andriamiadana J, Andriamahefazafy B, May JF, Behets F,  
654 Rasamindrakotroka A. Le SIDA à Madagascar. I. Epidémiologie, projections,  
655 impact socio-économique, interventions [AIDS in Madagascar. I.  
656 Epidemiology, projections, socioeconomic impact, interventions]. *Bull Soc*  
657 *Pathol Exot.* 1998;91(1):68-70. French. PMID: 9559168.
- 658 41. Nsubuga RN, White RG, Mayanja BN, Shafer LA. Estimation of the HIV  
659 basic reproduction number in rural south west Uganda: 1991-2008. *PLoS*  
660 *One.* 2014 Jan 3;9(1):e83778. doi: 10.1371/journal.pone.0083778.
- 661 42. Diekmann O, Heesterbeek JA, Roberts MG. The construction of next-  
662 generation matrices for compartmental epidemic models. *J R Soc Interface.*

- 663           2010 Jun 6;7(47):873-85. doi: 10.1098/rsif.2009.0386.
- 664           43. Britton T, Ball F, Trapman P. A mathematical model reveals the influence of  
665           population heterogeneity on herd immunity to SARS-CoV-2. *Science*. 2020  
666           Aug 14;369(6505):846-849. doi: 10.1126/science.abc6810.
- 667           44. Jin H, Restar A, Beyrer C. Overview of the epidemiological conditions of HIV  
668           among key populations in Africa. *J Int AIDS Soc*. 2021 Jul;24 Suppl 3(Suppl  
669           3):e25716. doi: 10.1002/jia2.25716.
- 670           45. Asher AK, Hahn JA, Couture MC, Maher K, Page K. people who inject drugs,  
671           HIV risk, and HIV testing uptake in sub-Saharan Africa. *J Assoc Nurses  
672           AIDS Care*. 2013 Nov-Dec;24(6):e35-44. doi: 10.1016/j.jana.2012.09.003.
- 673           46. Okano JT, Sharp K, Valdano E, Palk L, Blower S. HIV transmission and  
674           source-sink dynamics in sub-Saharan Africa. *Lancet HIV*. 2020  
675           Mar;7(3):e209-e214. doi: 10.1016/S2352-3018(19)30407-2. Epub 2020 Feb  
676           14. PMID: 32066532; PMCID: PMC7259817.
- 677           47. Okano JT, Busang L, Seipone K, Valdano E, Blower S. The potential impact  
678           of country-level migration networks on HIV epidemics in sub-Saharan  
679           Africa: the case of Botswana. *Lancet HIV*. 2021 Nov 10:S2352-  
680           3018(21)00267-8. doi: 10.1016/S2352-3018(21)00267-8. Epub ahead of  
681           print. PMID: 34774183.
- 682           48. UNAIDS; Country Fact Sheet Madagascar 2020. Available at  
683           <https://www.unaids.org/en/regionscountries/countries/madagascar>.  
684           Accessed on July 2022.
